# Supplementary material for: Design and development of a copper–manganese oxide nanocatalyst for the sustainable synthesis of 1,4-disubstituted 1,2,3-triazoles
Source: Royal Society of Chemistry journal article supplement (doi:10.1039/d4dt02898h), 2025-01-01

### Supporting information

## Design and development of copper-manganese oxide nanocatalyst for the sustainable synthesis of 1,4-disubstituted 1,2,3-triazoles

*Manish Rawat*<sup>\*a†</sup>, *Nitish Kumar Sinha*<sup>b†</sup>, *Srishti Rawat*<sup>c</sup>, *Kemant Pratap*<sup>d</sup>, *Vandana Saraswat*<sup>a</sup>, *Akash Kumar*<sup>a</sup> and *Sahil Kohli*<sup>e</sup>

<sup>a</sup>Department of Chemistry, School of Basic Sciences, Galgotias University, Greater Noida, UP-201310, India

<sup>b</sup>Department of Applied Sciences, Department of Civil Engineering, Galgotias College of Engineering & Technology, Greater Noida, Uttar Pradesh, 201310, India

<sup>c</sup>Department of Chemistry, University of Delhi, Delhi-110007, India

<sup>d</sup>Regional Institute of Education (RIE) NCERT Manasagangothri, Mysuru-570006

<sup>e</sup>Manav Rachna International Institute of Research and Studies, Faridabad, Haryana-121004, India

E-mail: [rawatmanish913@gmail.com](mailto:rawatmanish913@gmail.com)

<sup>†</sup>Equal Author contribution

\*Corresponding Author

Electronic Supplementary Information (ESI) includes PXRD and TEM image of recycled CuO@MnO<sub>2</sub> nanocatalyst; Green chemistry metric calculations, <sup>1</sup>H NMR and <sup>13</sup>C NMR spectra of all compounds.

**Total No of Pages: 19, Total No of Tables: 0, Total number of Figures: 2.**

| Serial number | Contents                                             | Page number |
|---------------|------------------------------------------------------|-------------|
| 1.            | General Remarks                                      | S2          |
| 2.            | PXRD and TEM images of recycled CuO@MnO <sub>2</sub> | S2          |

|    |                                                       |    |
|----|-------------------------------------------------------|----|
| 3. | Calculation of Green chemistry metrics ( <b>3a</b> )  | S3 |
| 4. | $^1\text{H}$ and $^{13}\text{C}$ spectra of compounds | S5 |

## **1. General Remarks**

Chemicals and solvents were purchased from Sigma Adrich, Alfa-Aesar and Merck India Pvt.  $^1\text{H}$  and  $^{13}\text{C}$  spectra were recorded on a Jeol Spectrospin spectrometer at 400 MHz and 100 MHz respectively by keeping TMS as internal standard. Chemical shift values were recorded in terms of  $\delta$  and coupling constants (J) are in hertz (Hz). FT-IR spectra were recorded on Perkin Elmer. Field Emission Scanning Electron microscopy (FESEM) measurement was performed on a Zeiss Gemini SEM 500 thermal field emission type with acceleration voltage 0.02 – 30kV at USIC (University Science Instrument Centre), University of Delhi, Delhi, India. Field Emission Gun -Transmission electron microscope 200 KV (HR-TEM) was obtained on a JEOL JEM 2100F at Centre for Research in Nanotechnology and Science (CRNTS), IIT Bombay, Bombay, India. X-ray diffraction (XRD) patterns were recorded on Rigaku Rotaflex spectrometer at  $2\theta$  range of  $10\text{--}90^\circ$  with Cu  $K\alpha$  radiation. The elemental composition and electronic structure analysis were obtained from X-ray photoelectron spectra (XPS) of PHI Versa Probe III instrument equipped with a monochromatic Al  $K\alpha$  source at ISM dhanbad. ICP-MS was measured on Agilent ICP-MS 7900 with UHMI at the ICP-MS Lab, (CRF Adopted Facility), IIT Delhi, INDIA. BET experiment was performed on BET surface area analyzer, Quantachrome Instruments, ASI-CI-11 at USIC (University Science Instrument Centre), University of Delhi, Delhi, India.

## **2. PXRD and TEM images of recycled CuO@MnO<sub>2</sub> nanocomposites**

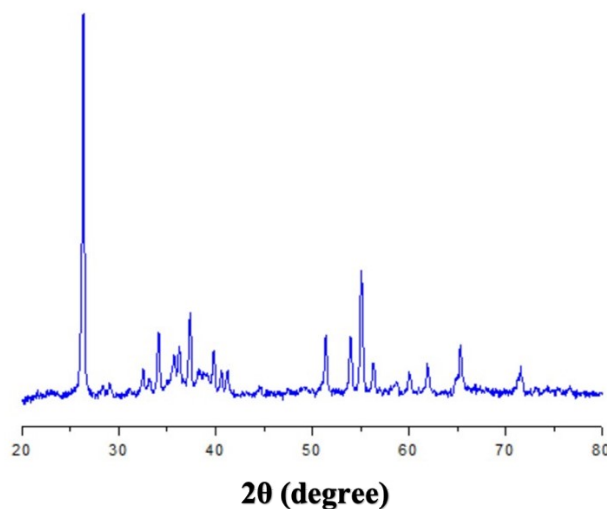

**Figure S1:** PXRD of recycled CuO@MnO<sub>2</sub> nanocomposites.

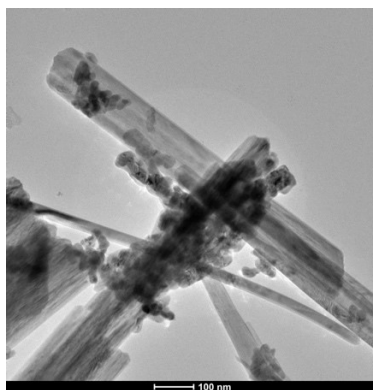

Figure S2: TEM image of recycled CuO@MnO<sub>2</sub> nanocomposites.

### 3. Calculation of E-factor and atom economy of compound 3a

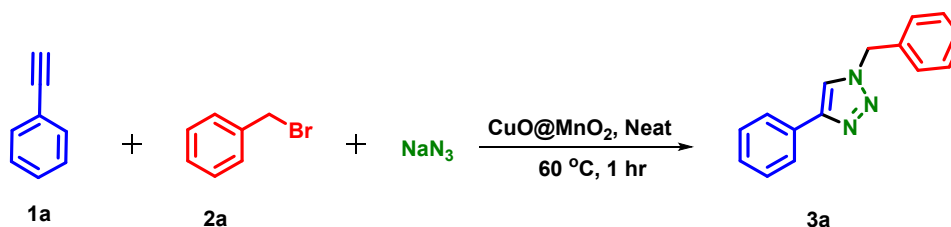

|               |              |              |            |              |
|---------------|--------------|--------------|------------|--------------|
| <b>FW</b>     | 102.13 g/mol | 171.04 g/mol | 65.01g/mol | 235.29 g/mol |
| <b>m.mol</b>  | 0.50         | 0.50         | 1          | 0.47         |
| <b>amount</b> | 51 mg        | 86 mg        | 65 mg      | 110 mg       |

#### E-factor:

The ideal value of E-factor is zero.

E-factor = [total mass of raw materials - the total mass of product]/ mass of product.

$$\begin{aligned} \text{E-factor of } \mathbf{3a} &= [(51 + 86 + 65) - 110] / 110 \\ &= 0.84. \end{aligned}$$

#### Process mass intensity (PMI):

$$\begin{aligned} \text{PMI} &= \sum (\text{mass of stoichiometric reactants}) / [\text{mass of product}] \\ &= (51 + 86 + 65) / 110 \\ &= 1.84. \end{aligned}$$

#### Reaction mass efficiency (RME):

$$\begin{aligned} \text{RME} &= [\text{mass of product} / \sum (\text{mass of stoichiometric reactants})] \times 100 \\ &= [110 / (51 + 86 + 65)] \times 100 \\ &= 54.45\% \end{aligned}$$

**Carbon efficiency (CE):**

CE denotes the percentage of carbon in the reactants that remains in the product.

$$\begin{aligned} \text{CE} &= [\text{Amount of carbon in product} / \text{Total carbon present in reactants}] \times 100 \\ &= [\text{no. of moles of product} \times \text{no. of carbons in product} / (\text{moles of 1a} \times \text{carbons in 1a} + \text{moles of 2} \times \text{carbons in 2})] \times 100 \\ &= [0.46 \times 15 / (0.50 \times 7 + 0.50 \times 8)] \times 100 \\ &= [6.9 / (3.5 + 4)] \times 100 \\ &= 92\% \end{aligned}$$

**Turnover number (TON):** The number of moles of substrate that converted by a mole of catalyst before its inactivation. TON is calculated for 5 cycles of the reaction with 25 mg of CuO@MnO<sub>2</sub>.

$$\text{TON} = [\text{No. of moles of product}] \div [\text{No. of moles of catalyst}]$$

$$\text{TON of compound 3a: } [0.47 (1) + 0.46 (2) + 0.46 (3) + 0.44 (4) + 0.44 (5)] / [0.00252]$$

$$\text{TON of compound 3a: } 901$$

## 4. $^1\text{H}$ and $^{13}\text{C}$ Spectra of compounds

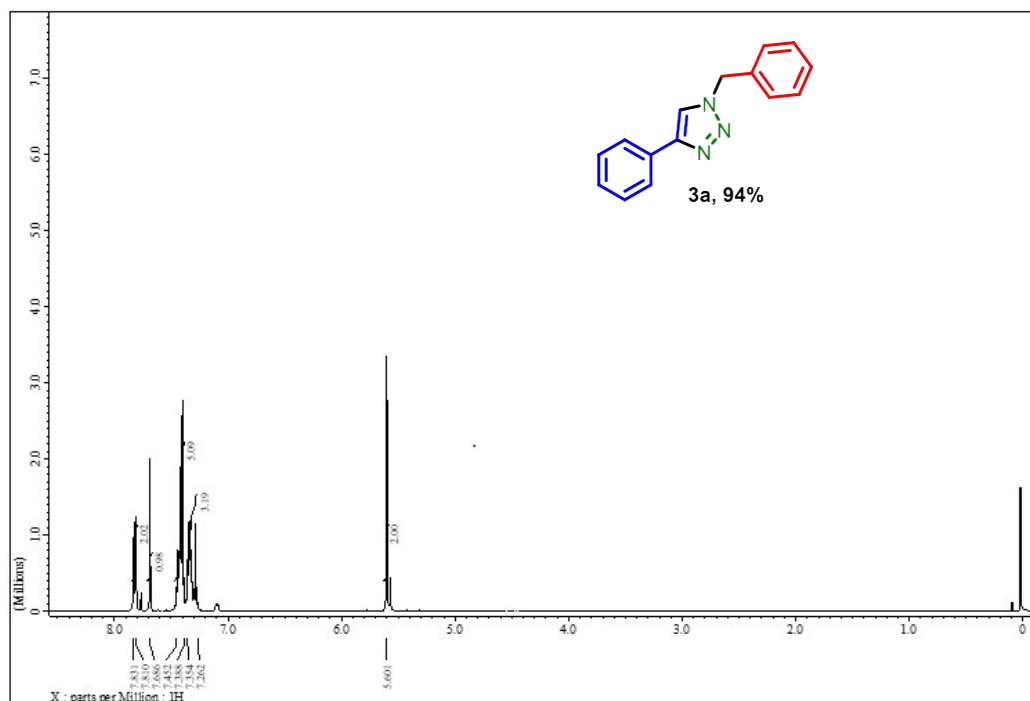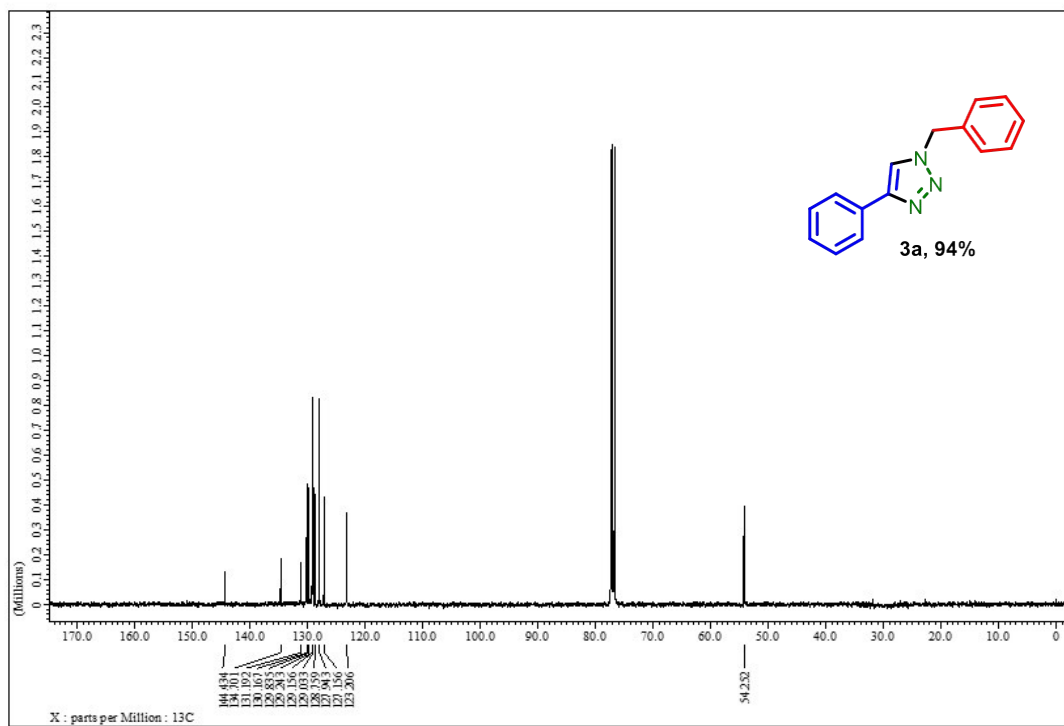

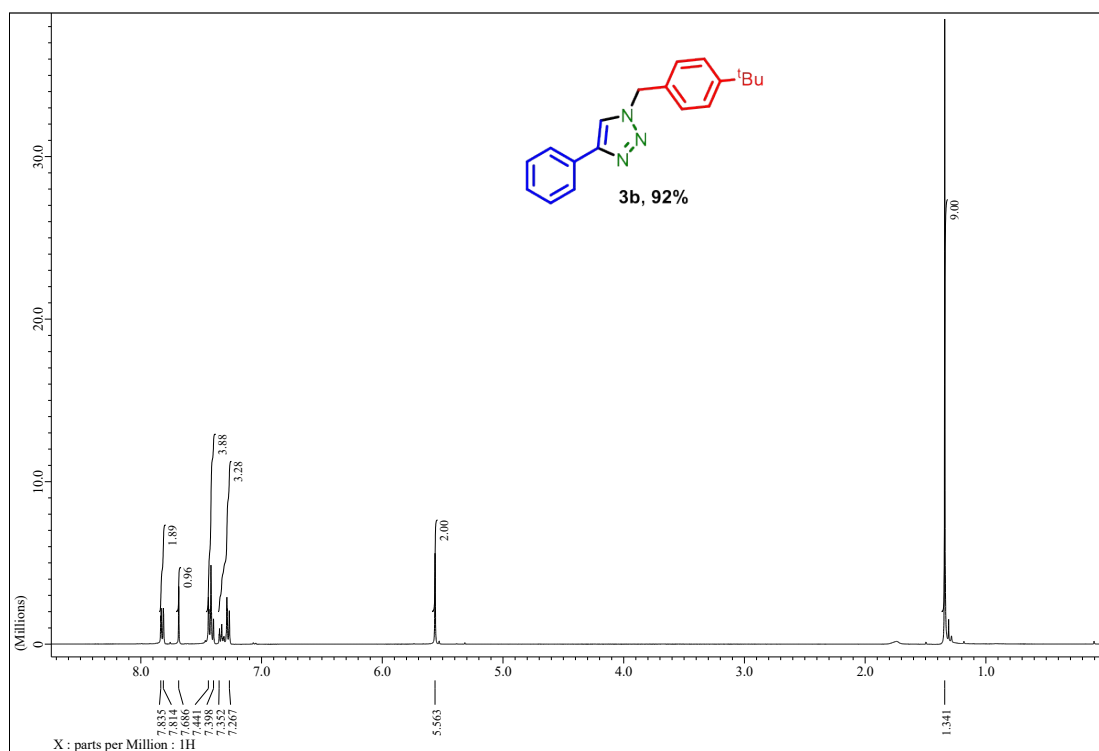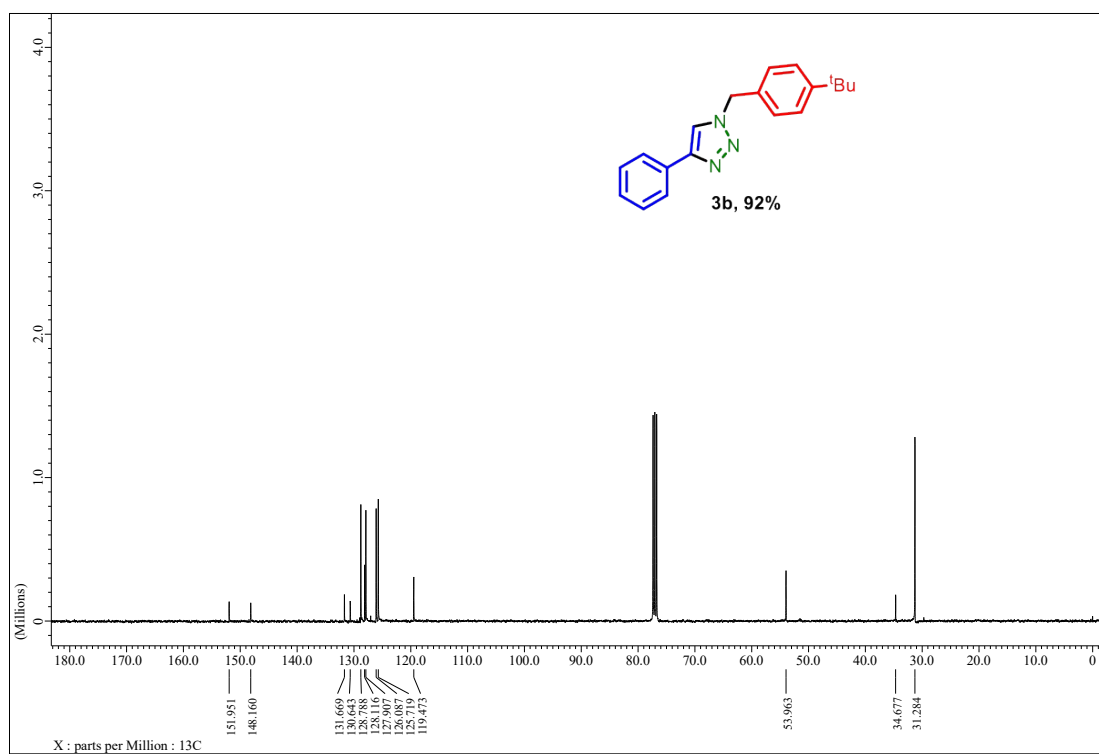

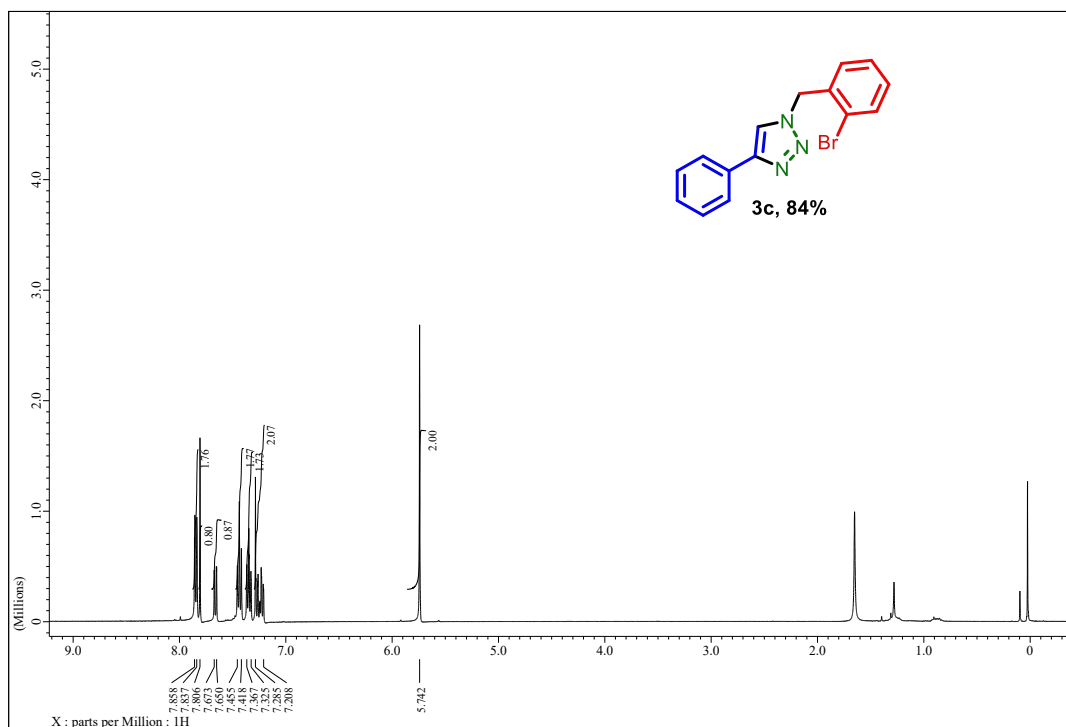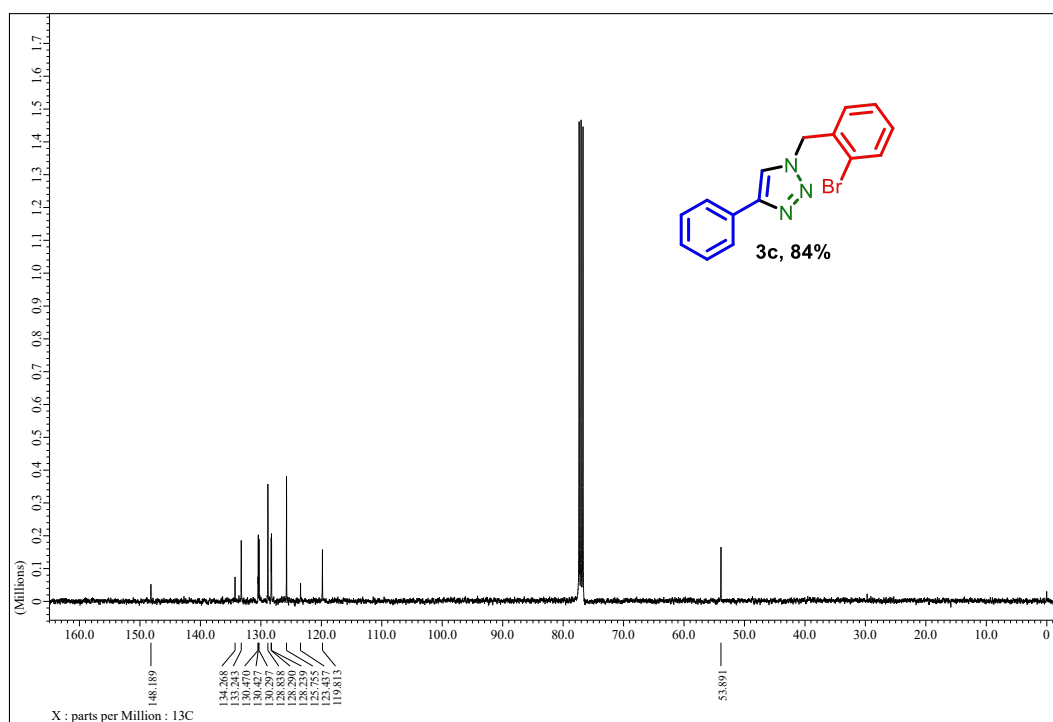



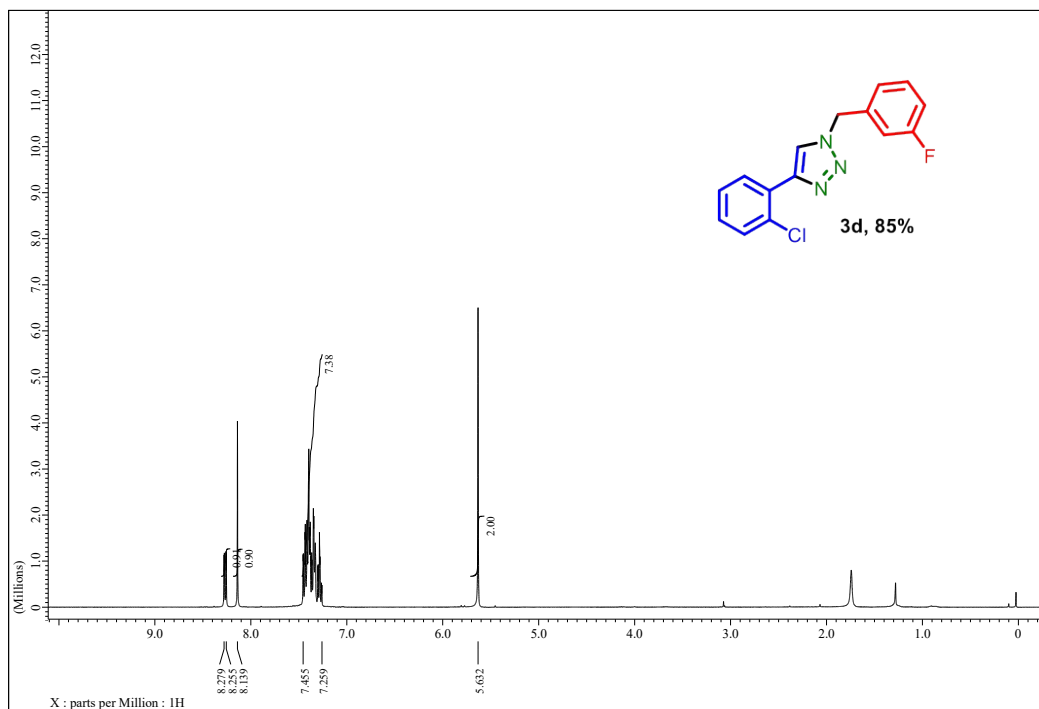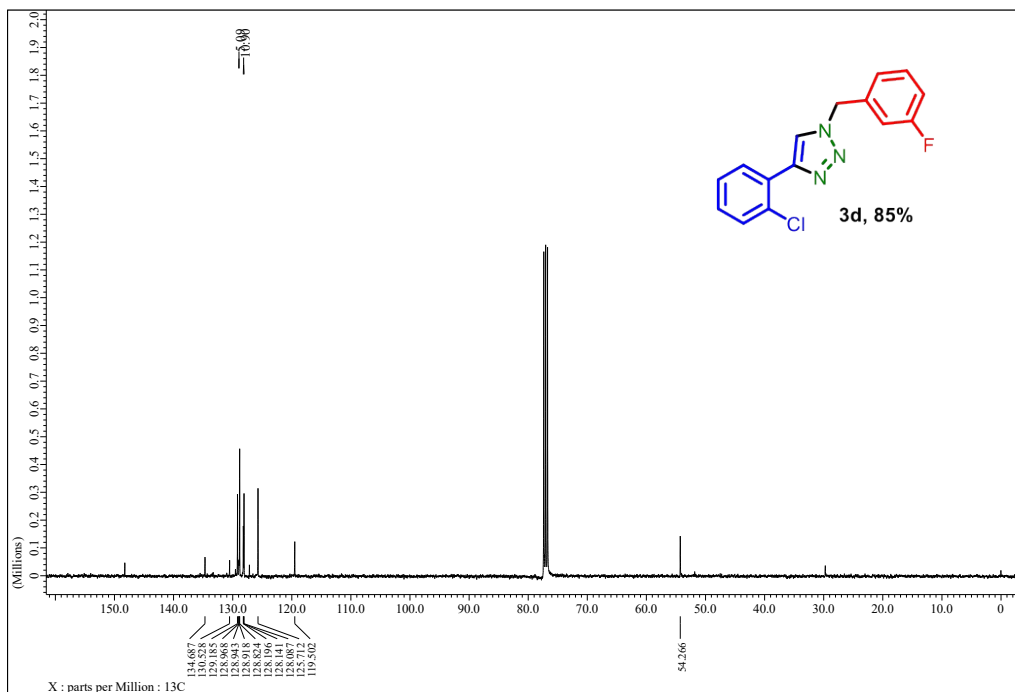

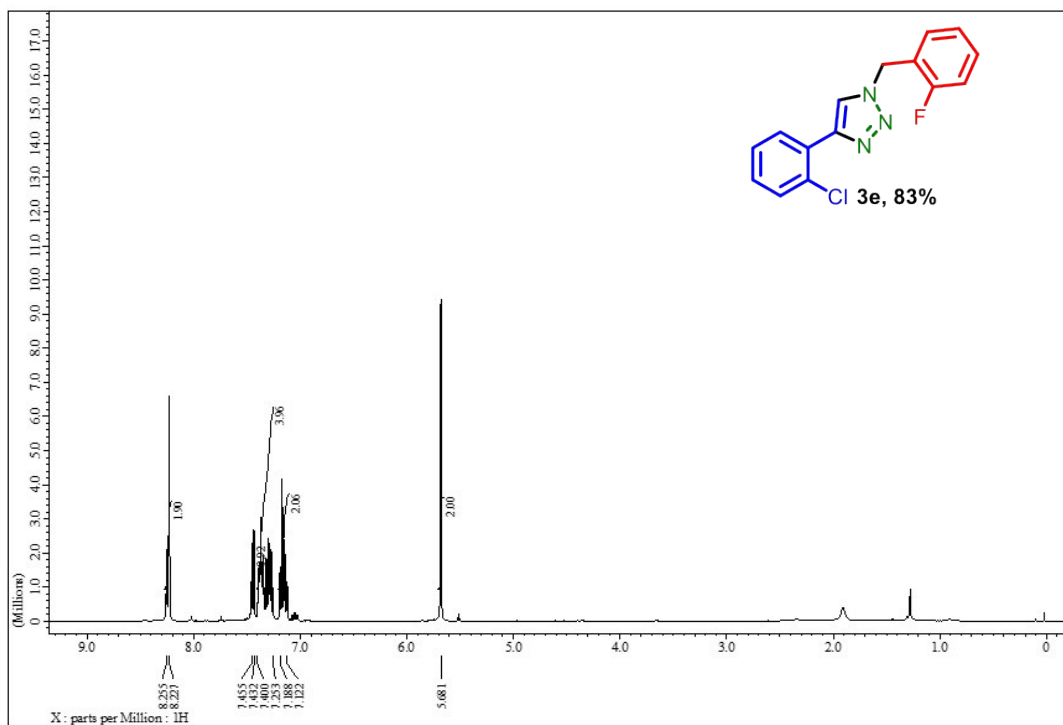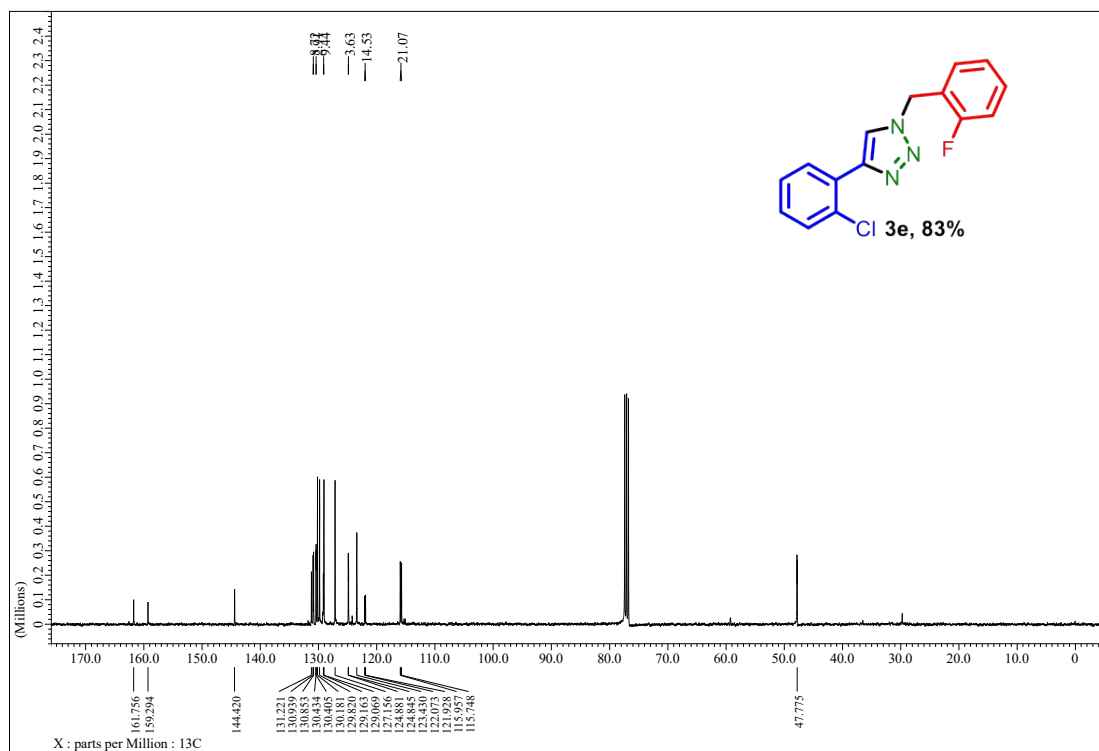

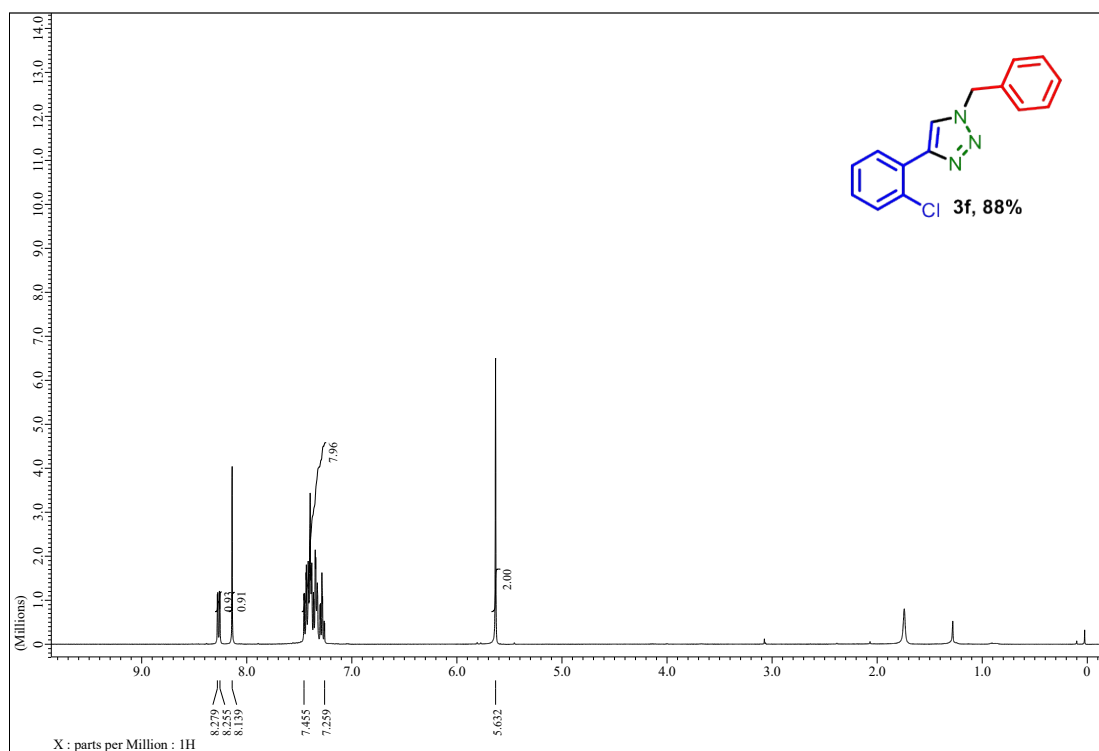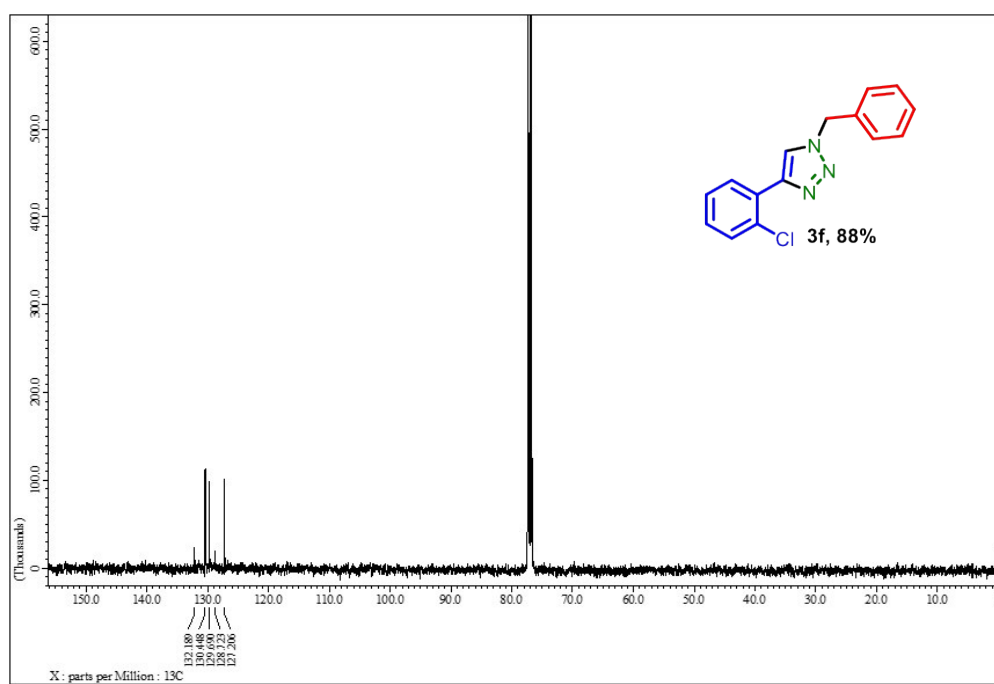

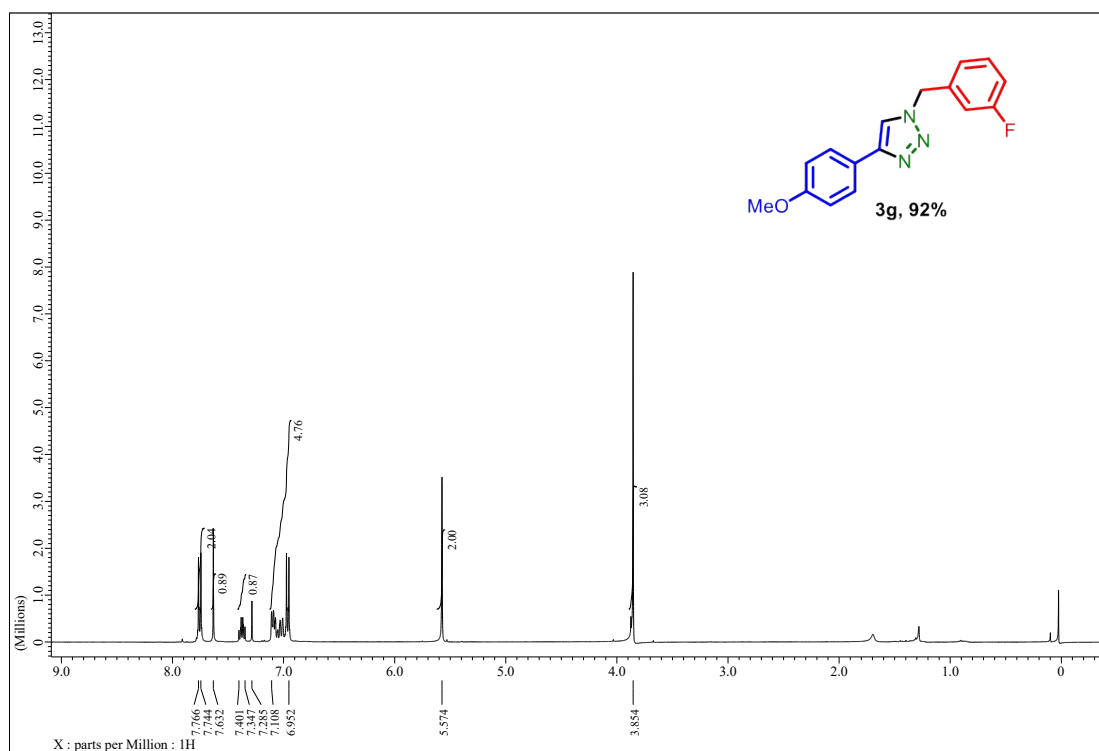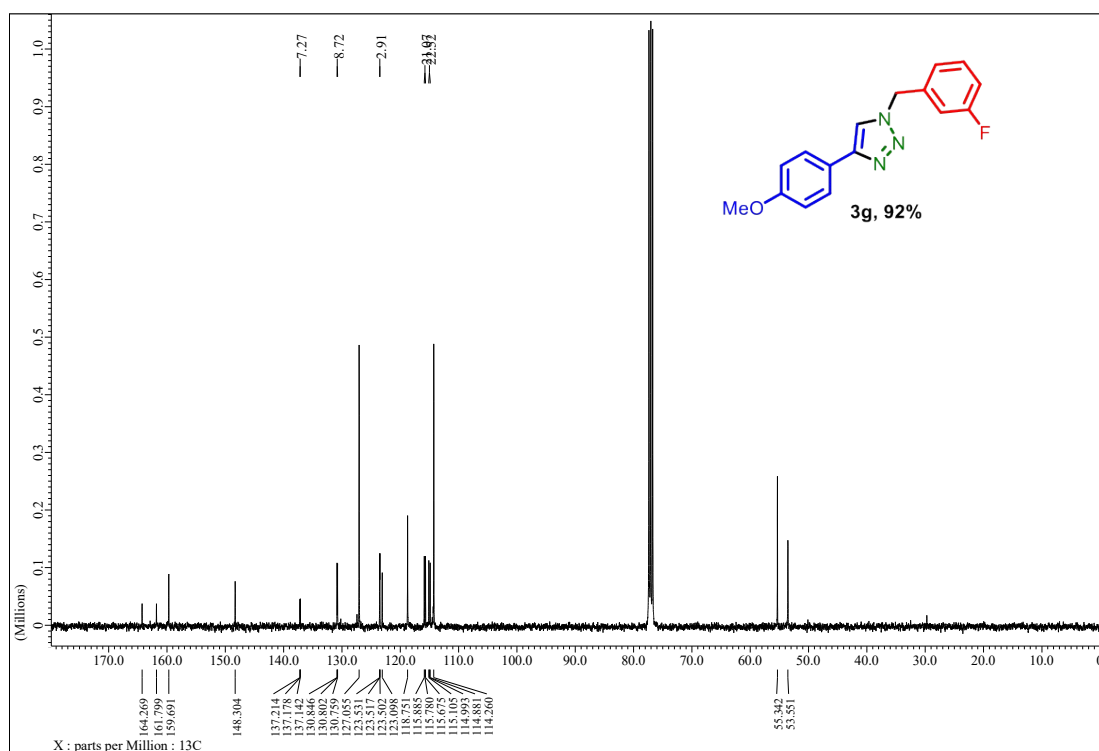

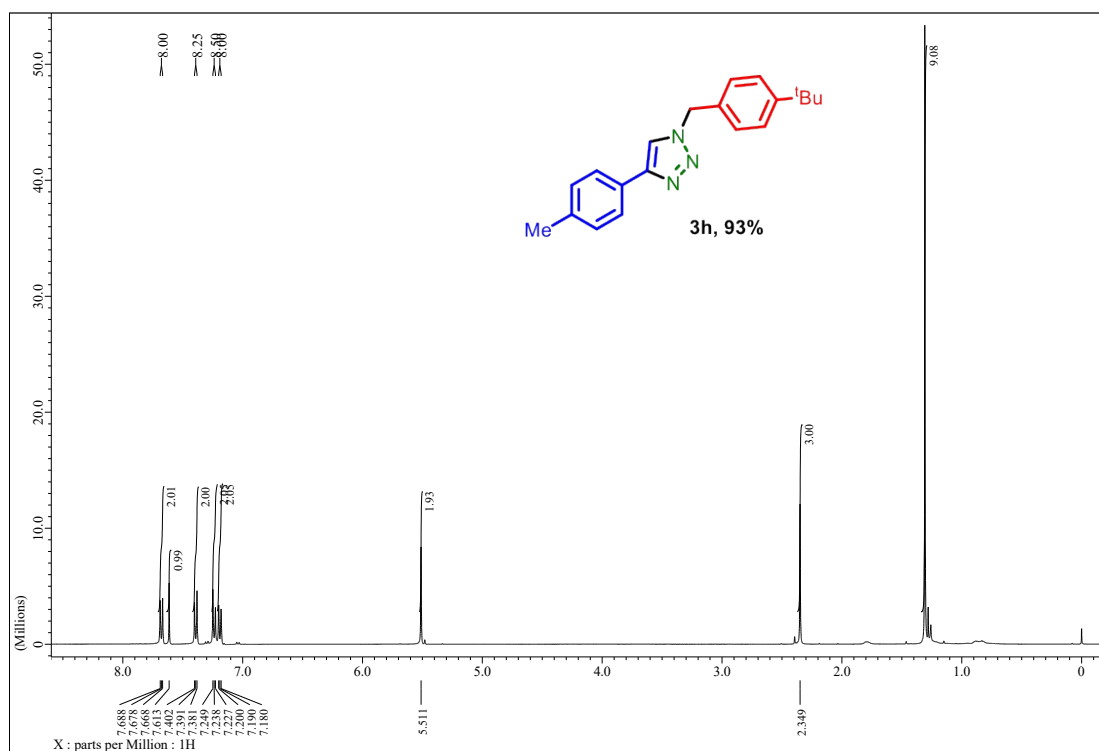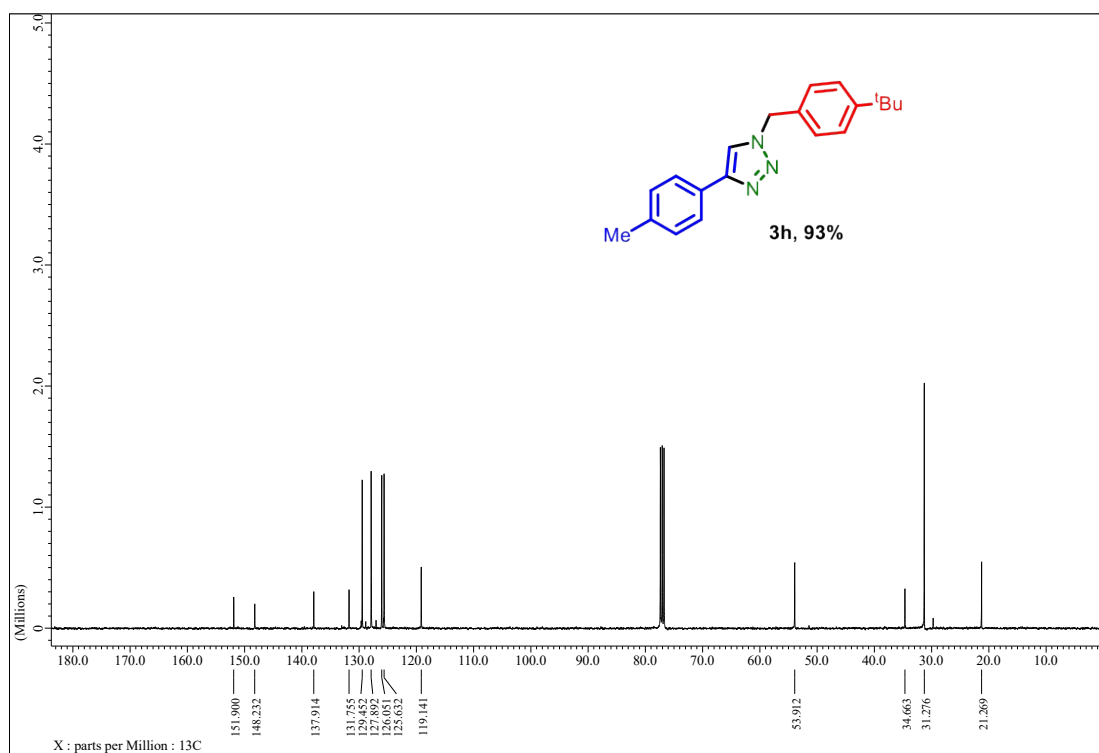

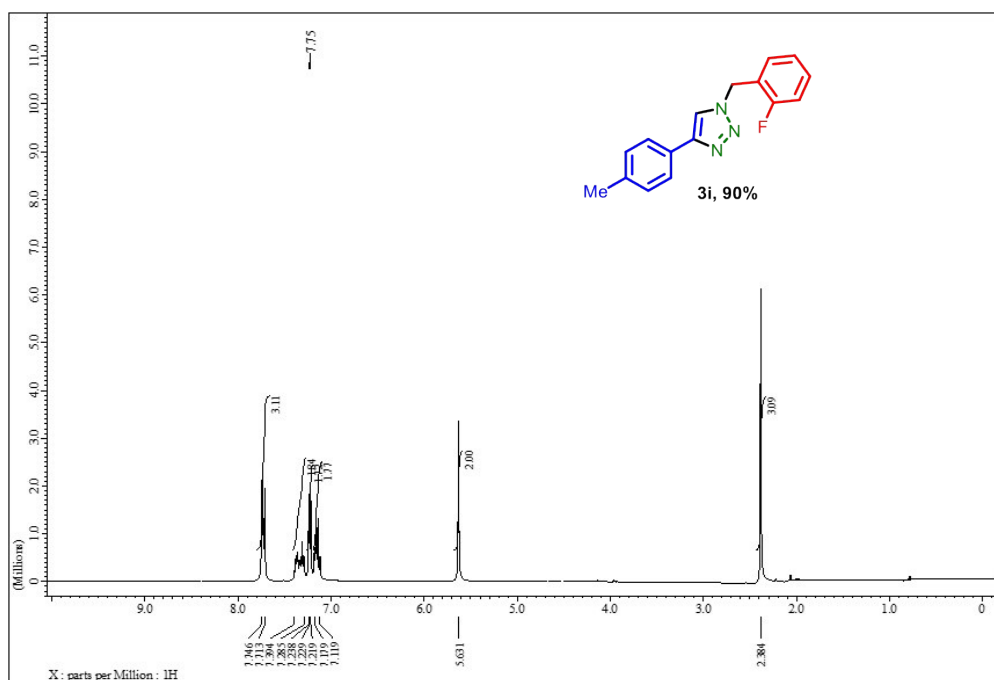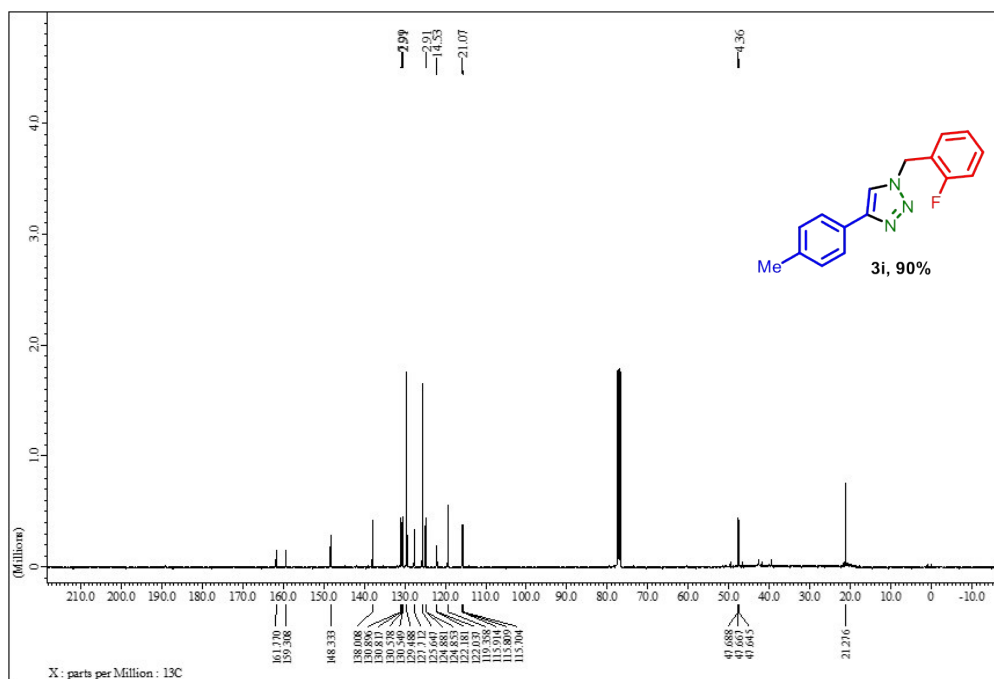

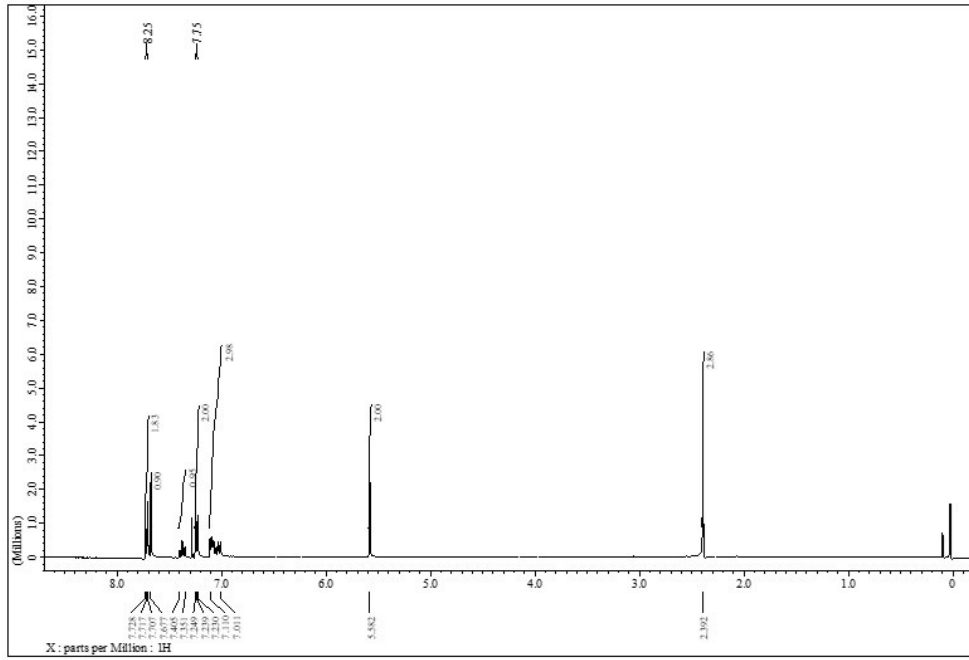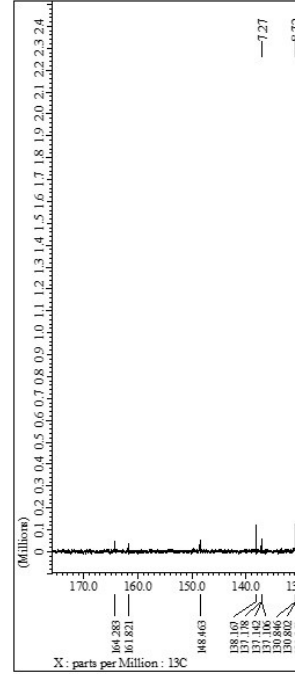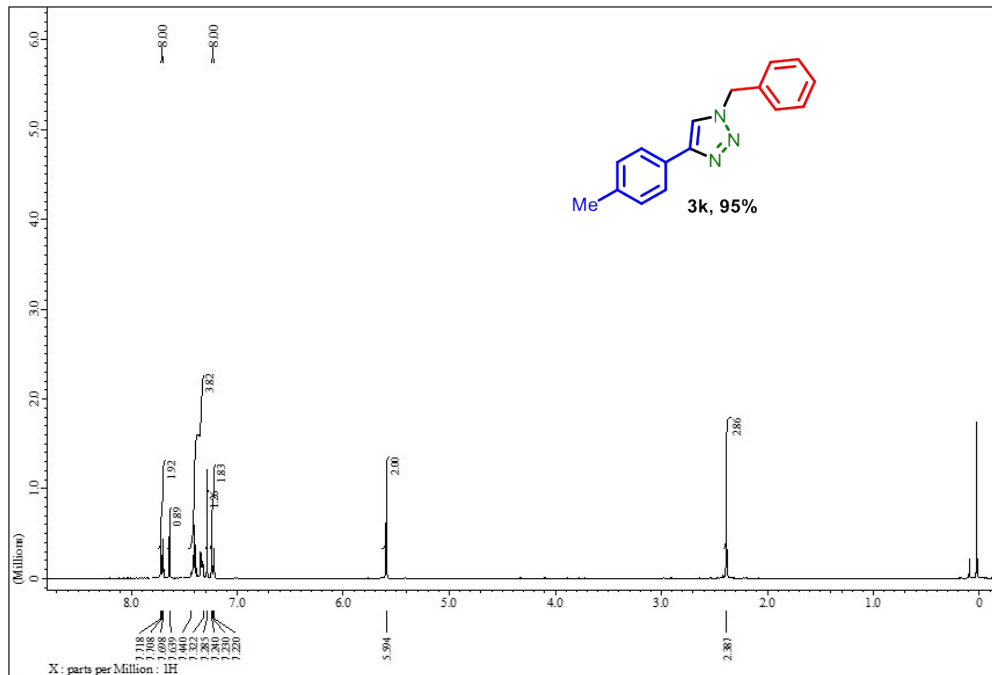

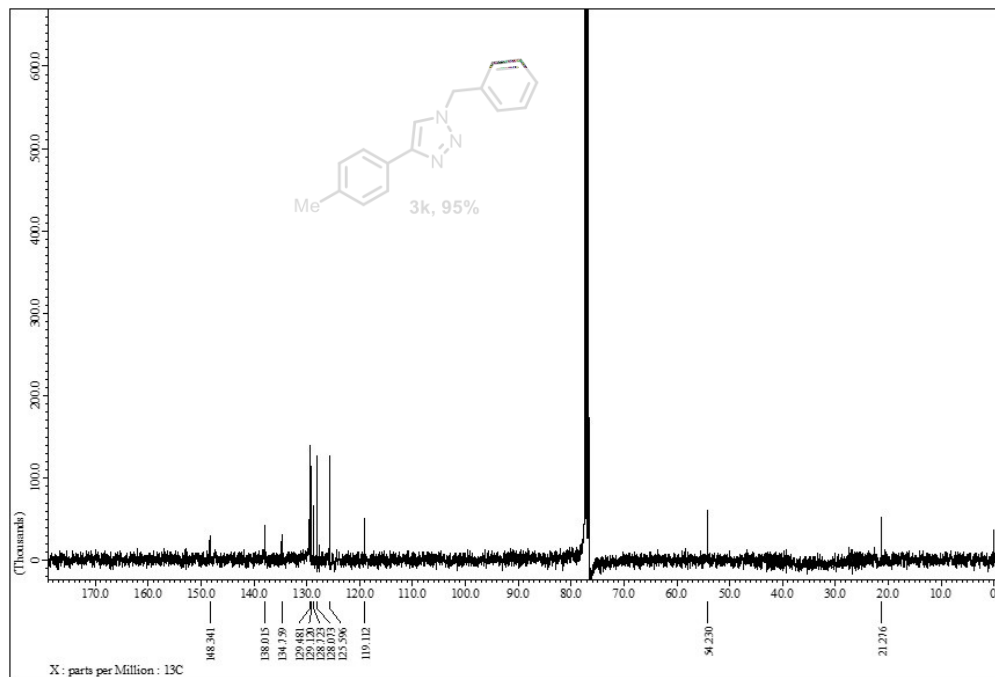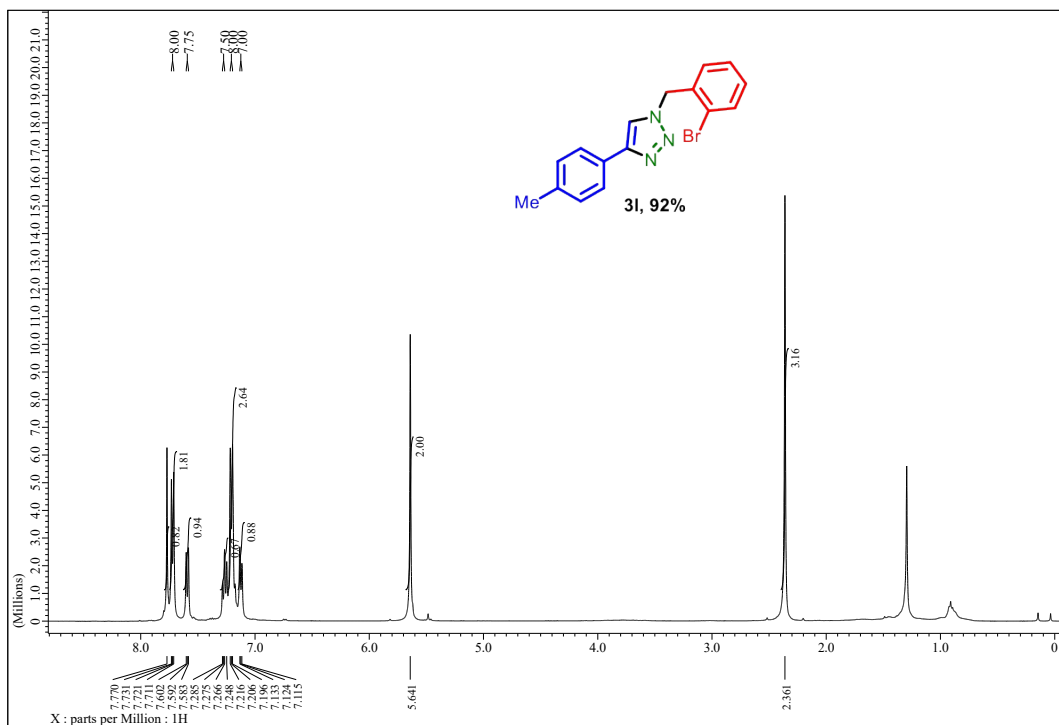



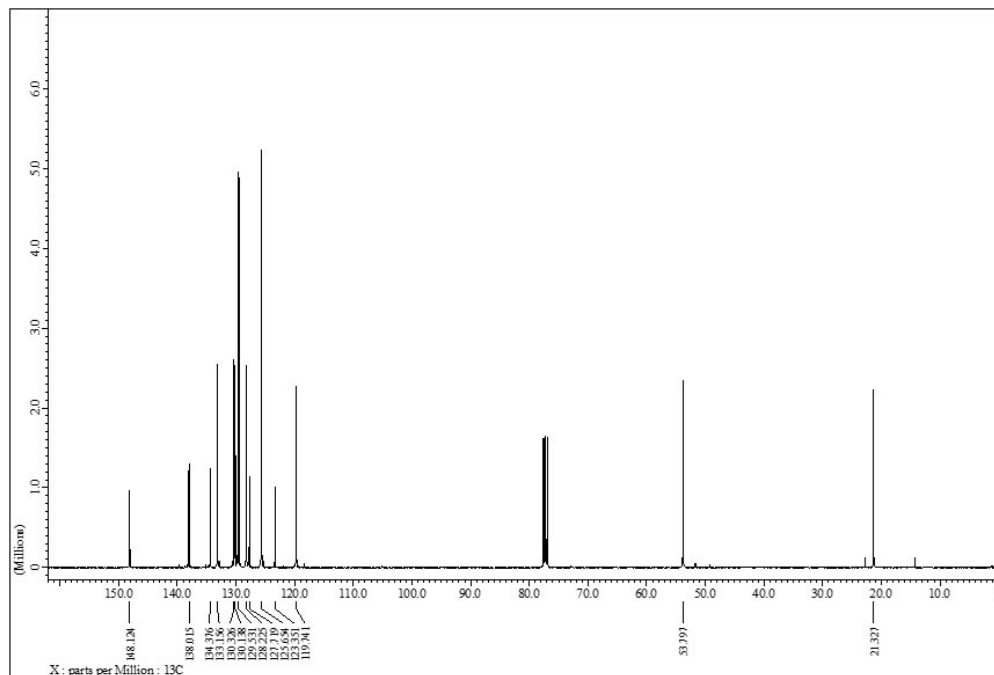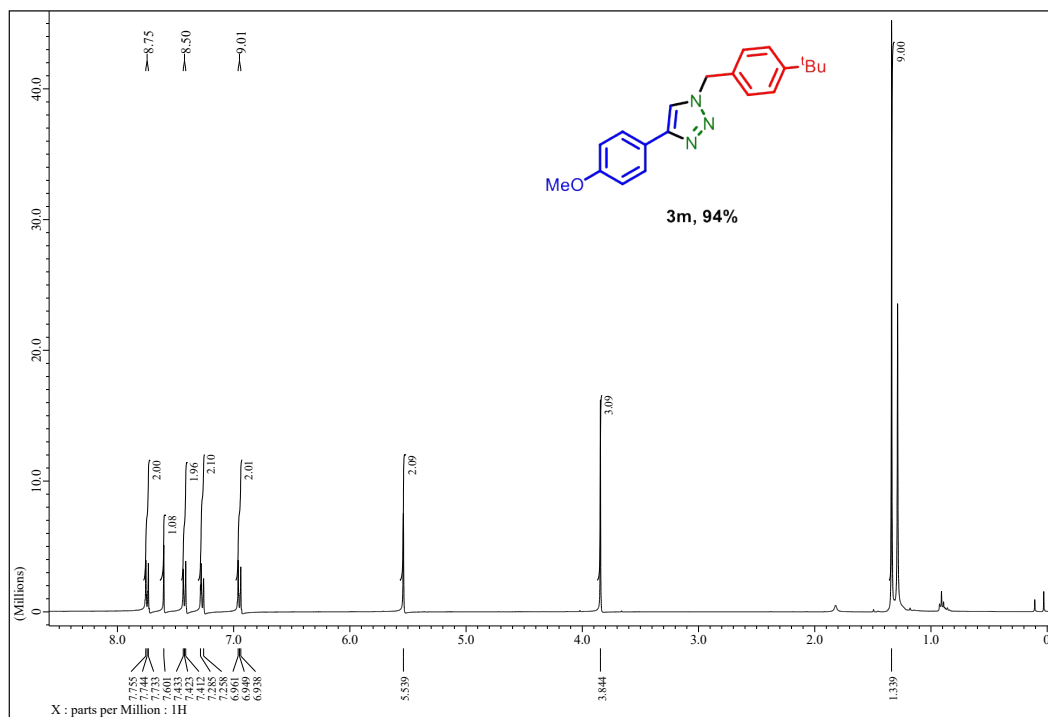

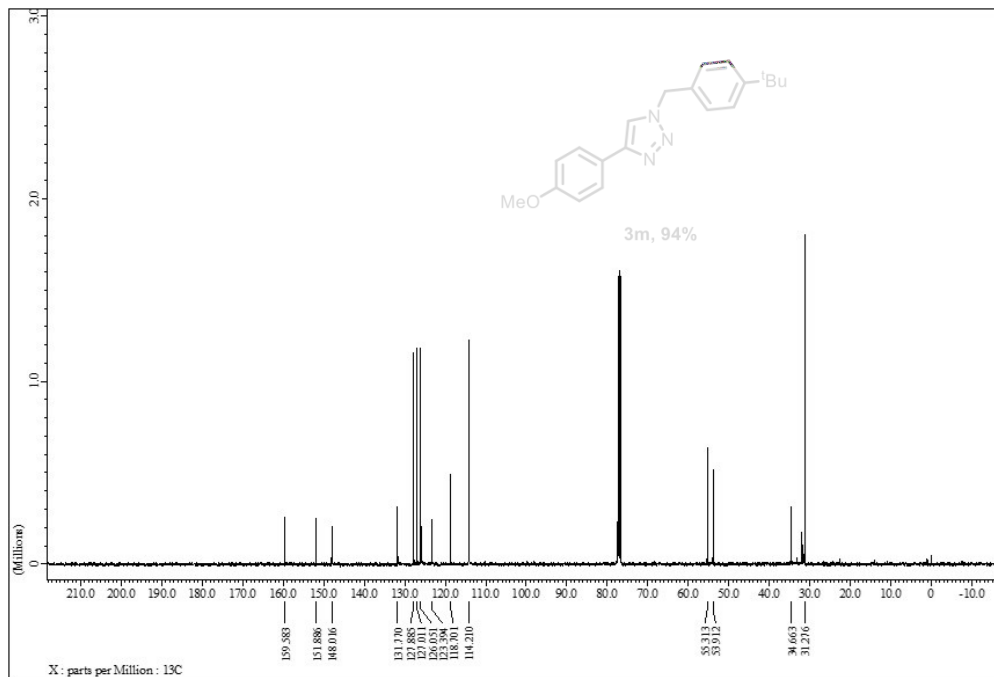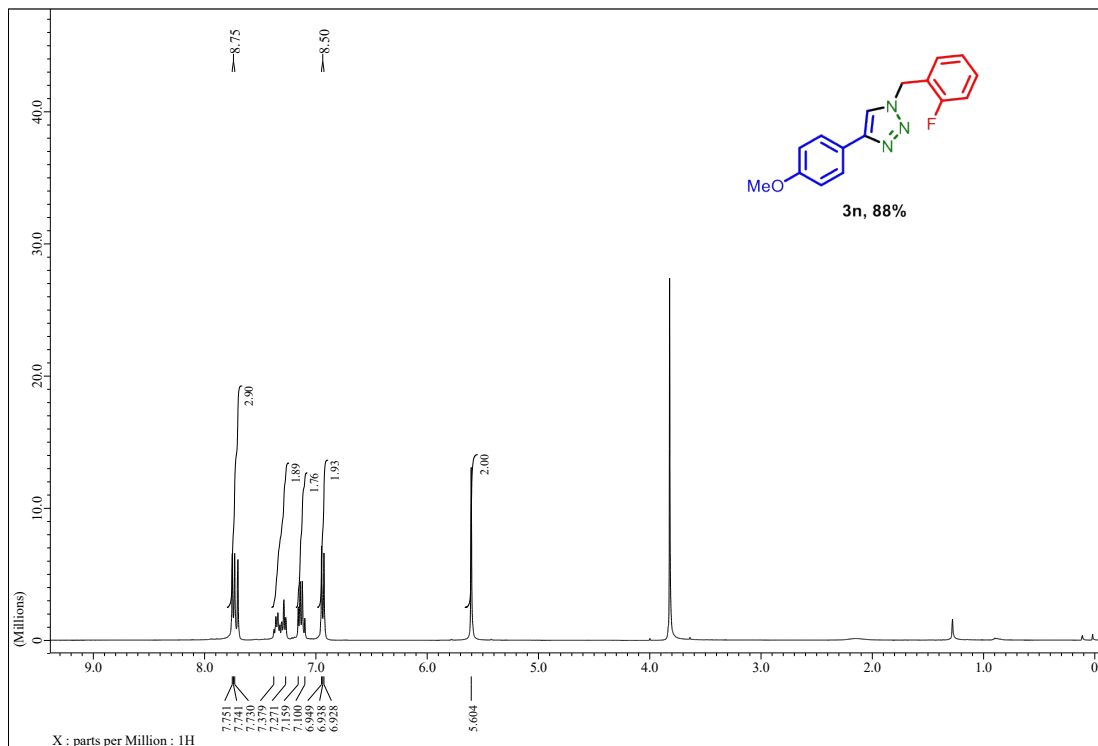

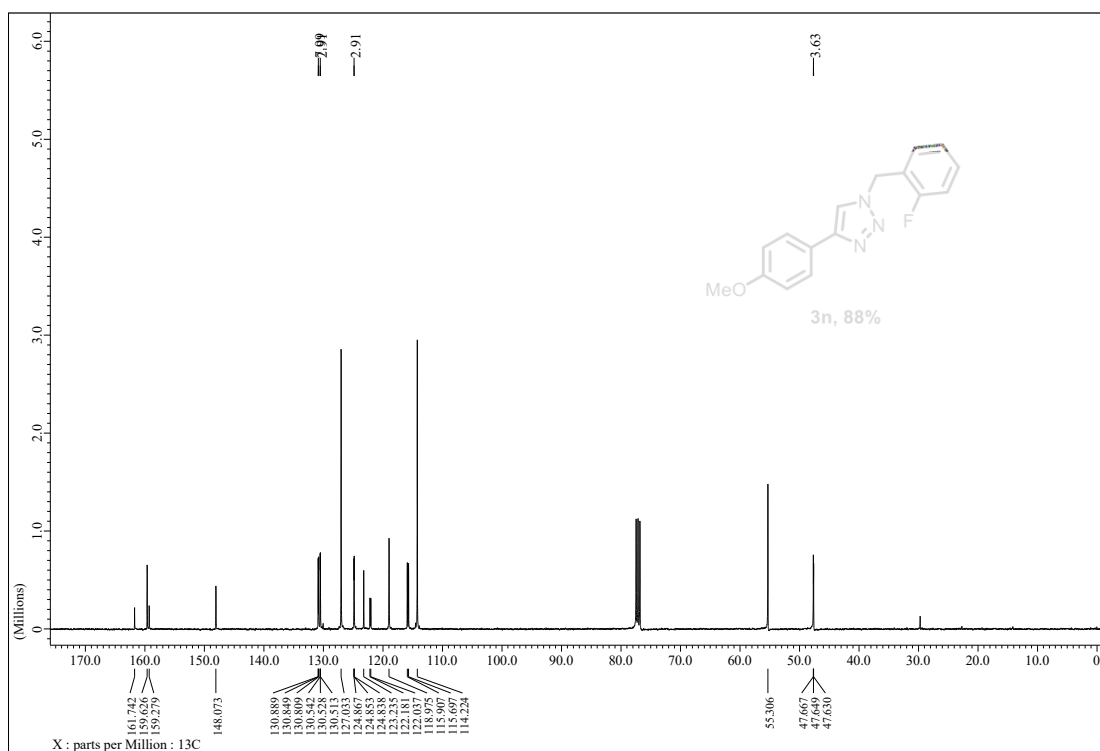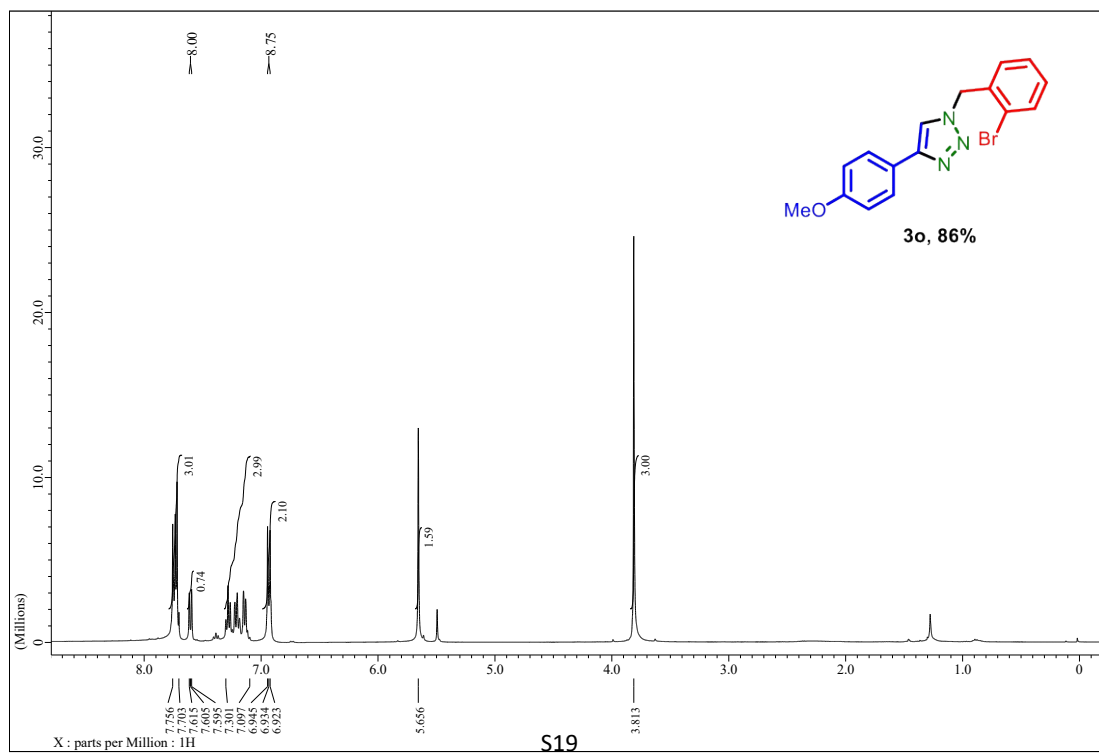

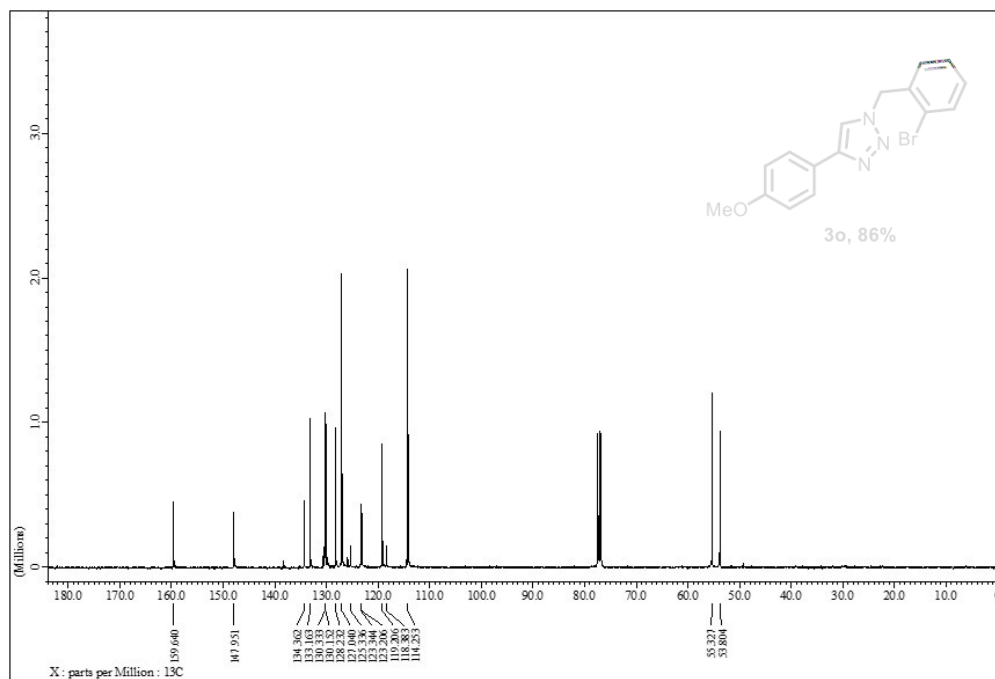

Supplement: d4dt02898h1.pdf [file d4dt02898h1.pdf]
